# Supplementary material
Source: MDPI journal article supplement (https://www.mdpi.com/2073-445X/7/4/121)
Supplement: s1 [file s1]

## Questionnaire

Written consent (signature): \_\_\_\_\_

House number: \_\_\_\_\_ Date \_\_\_\_\_

### Section A: Fields

1. Does your household currently have any fields? [ yes ] [ no ]
2. If no, did you used to? [ yes ] [ no ]

|   | How many fields does your household have? | When were they cleared? | When were they last cultivated? | What was planted? | What is the approximate size of the field/s? |
|---|-------------------------------------------|-------------------------|---------------------------------|-------------------|----------------------------------------------|
| 1 |                                           |                         |                                 |                   |                                              |
| 2 |                                           |                         |                                 |                   |                                              |
| 3 |                                           |                         |                                 |                   |                                              |
| 4 |                                           |                         |                                 |                   |                                              |
| 5 |                                           |                         |                                 |                   |                                              |
| 6 |                                           |                         |                                 |                   |                                              |
| 7 |                                           |                         |                                 |                   |                                              |

1. Why has cultivation stopped in any of the fields: \_\_\_\_\_  
\_\_\_\_\_

2. Did any of these also factors that contributed to stopping cultivation?

| Reasons                                       | Tick | Reason/Why |
|-----------------------------------------------|------|------------|
| Not enough equipment                          |      |            |
| Fertilizer and tools are too expensive        |      |            |
| Not enough capable labourers in the household |      |            |
| Not worth it                                  |      |            |
| Have an income or food so don't need to farm  |      |            |
| Not interested                                |      |            |
| Don't know how to                             |      |            |
| It is for the poor                            |      |            |

|                                |  |  |
|--------------------------------|--|--|
| Weather is unpredictable       |  |  |
| Cattle and goats eat the crops |  |  |
| Soil is poor                   |  |  |
| Pests, insects wild animals    |  |  |
| Other                          |  |  |

3. Is there a length of time which if you do not cultivate a specific field, it is no longer yours or can be assigned to another household? [ yes ] [ no ]

4. If yes, how long?: \_\_\_\_\_

### **Section B: Use of abandoned fields**

5. Are abandoned fields used for grazing: [ yes ] [ no ]

6. Are open grasslands used more regularly than old fields for grazing: [ yes ] [ no ]

7. Can anyone in the village graze or collect non-timber forest products (NTFPs) in an abandoned field: [ yes ] [ no ]

8. If no, why not?: \_\_\_\_\_

9. If yes, must they get permission from the owner? [ yes ] [ no ]

### **Section C: Perceptions/ Trends**

10. If "Other" is ticked please give reason: \_\_\_\_\_

11. Is agriculture playing the same role as it did 50 years ago? [ yes ] [ no ]

12. If no, why not?: \_\_\_\_\_

13. If you have not cultivated for 5 years or more do you think you will again: [ yes ] [ no ]

14. Why? \_\_\_\_\_

15. What would encourage you or make you start cultivation again:

\_\_\_\_\_

16. Do you think the land use around your village has changed in the past 50 years: [ yes ] [ no ]

17. If yes, how so? \_\_\_\_\_

18. Where is it changing: \_\_\_\_\_

19. Why is it changing?: \_\_\_\_\_

**Section D: General (Biographical and Socio-Economic)**

20. Male [ ] Female [ ]

21. Year of birth: \_\_\_\_\_

22. How long have you lived in this: Household: \_\_\_\_\_ Village \_\_\_\_\_

23. Household size: Adults \_\_\_\_\_ Children <18 \_\_\_\_\_

24. Number of wage earners in household \_\_\_\_\_

25. Number of Grants \_\_\_\_\_ pensions \_\_\_\_\_

26. Education (highest level): \_\_\_\_\_

27. How much does/did farming contribute to your livelihoods?: ZAR \_\_\_\_\_

28. Do you have:

a. Cattle? No. \_\_\_\_\_

b. Goats? No. \_\_\_\_\_

c. Sheep? No. \_\_\_\_\_
